# Supplementary material
Source: publisher site journal article supplement (https://www.dovepress.com/article/596366)
Supplement: Supplementary file 1 [file 596366%20Revised%20Supplemental%20Material.docx]

**Supplementary Material 1**

- Acarbose
- Glimepiride
- Glipizide/Er/Xl
- Glyburide
- Glyburide Micronized
- Glyburide‐Metformin
- Metformin (Not Liquid)
- Metformin Er (Generic Glucophage Xr, Not Generic Fortamet or Glumetza)
- Pioglitazone
- Relion Novolin Insulin (Nph, Regular, 70/30)
- Relion Novolog
- Repaglinide

**Supplementary Material 2**

**Louisiana Blue Member Interview guide**

**Introduction**

*Note: This is a GUIDE, not a questionnaire. This means that the focus should be on listening, probing, and exploring the answers that are provided, not on finishing all the questions in this interview guide. Please also take note of when the participant gives an answer so that you don’t repeat questions that have already been answered, even if the answers came out of order.*

**Interviewer:** Hello, my name is __________________, and I want to thank you for agreeing to do this interview with me. We sent you information about the study and your decision to participate. Do you have any questions before we begin?

[Interviewer will have info sheet as a reference to answer questions.]

During this interview, I will share a story about a patient living with type 2 diabetes and how they take their medications. You can tell me what you think about it and fill in more details. You may also share how your own experience is similar or different from the story. We can go back and forth, like a conversation. You can take the story in any direction you want. Your opinions are very important. No opinion is right or wrong. Please feel free to be honest in our discussion today.

**Part 1.** Danielle is 53 and has been diagnosed with type 2 diabetes for about 3 years and she feels her diabetes is under control. She fills her prescriptions at Walgreens, and on her insurance plan, she gets some of her medication at no cost. The insurance company calls this a “zero-dollar copay” benefit. Although she knows it’s important to get her prescriptions filled and take her medications, sometimes she doesn’t take all her medications as instructed.

1. What might be the reasons why Danielle doesn’t always take her medications as instructed? (Probe: side effects, forgetting, time constraints, fears/concerns about taking too much)
   1. Is this different for diabetes medications and medications for other health conditions?
2. What could happen if Danielle doesn’t take her medications as instructed? (Probe: how might it affect her health and how well her diabetes is controlled)
3. If someone’s diabetes is under control or not under control, how do you think that might affect how they take their medications? (Probe: if and how they monitor control; whether they consider blood sugar/HbA1c as the metrics; what does it mean to have diabetes control)
4. Please tell me how you take your medications (how often, what do you do to remember, what time of day?)
   1. What could help people with diabetes make sure they take medications as instructed?

**Part 2**. Let’s shift back to Danielle’s story: The last couple of weeks, Danielle has had a hard time getting her medications prescribed on time and picking them up at the pharmacy. And sometimes, even if she gets her prescriptions filled, she doesn’t take the medication when she should. She’s been thinking about what might help her do better and worrying about what could happen if she doesn’t take her medications regularly.

1. What might be the reasons why Danielle’s not getting her prescriptions filled? (Probe: issues with pharmacy/refills, cost, transportation to pharmacy, etc.)
   1. What have you done if you ever faced problems like this? (Probe: medications delivered)
   2. Who could Danielle contact about the problems she is having? (Probe: health coaches, case managers)
   3. What other support could Danielle receive?
2. What difference could it make whether Danielle has a copay or no copay for her medications, or if some were free and she had to pay for others?
   1. Can you tell me about any times where something like this has happened to you? (Probe: were copays the issue)

**Part 3.** Recently Danielle has seen commercials on TV about a new medication for diabetes. She wonders if it might be right for her, but she knows that it’s more expensive than the medications she takes now. She wonders about brand name and generic drugs and what the differences are. Currently her medications are free or low cost, while other diabetes medications would be more expensive.

1. What do you define as an “expensive” medication (for example, what monthly cost would you say is expensive)?

Why do you think the prices of medication can be different? (Probe: brand name vs. generic)

1. What do you think the cost of a medication means about the medication, if anything? (Probe: do more expensive drugs work better, have fewer side effects, etc.?)
2. How does the cost make a difference to how you take it, or whether you take it as instructed?
3. What can you tell me about the cost of *your* medications? (Probe: are any of them free or low cost, are any expensive, do you take newer drugs like Ozempic or other semaglutide medication or insulin)
4. How has the cost of your medications changed over time (even with the same health insurance)?

**Part 4. Demographic Data**

1. Age
2. Residence: Urban/rural
3. Race and ethnicity
4. Sex
5. Length of time with diabetes
6. Education
7. Do you know if you are on the zero-dollar copay program?
